# Supplementary material for: Higher subcutaneous adipose tissue radiodensity is associated with increased mortality in patients with cirrhosis
Source: PubMed Central journal article supplement (PMC9117882; doi:10.1016/j.jhepr.2022.100495), 2022-04-27
Supplement: mmc1.pdf [file mmc1.pdf]

# Higher subcutaneous adipose tissue radiodensity is associated with increased mortality in patients with cirrhosis

Maryam Ebadi, Abha R. Dunichand-Hoedl, Elora Rider, Norman M. Kneteman, James Shapiro, David Bigam, Khaled Dajani, Vera C. Mazurak, Vickie E. Baracos, Aldo J. Montano-Loza

## Table of contents

|               |   |
|---------------|---|
| Table S1..... | 2 |
| Table S2..... | 3 |

**Table S1. Clinical Parameters Associated with Mortality in Patients without Sarcopenia**

| Characteristics                  | sHR (95% CI)      | P-value |
|----------------------------------|-------------------|---------|
| <b>Female Patients</b>           |                   |         |
| ALD cirrhosis                    | 0.47 (0.25-0.91)  | 0.03    |
| MELD score                       | 1.06 (1.02-1.11)  | 0.001   |
| Refractory Ascites               | 2.04 (0.90-4.64)  | 0.09    |
| Variceal bleeding                | 3.93 (1.10-14.09) | 0.04    |
| Encephalopathy                   | 2.65 (1.23-5.69)  | 0.01    |
| High SAT Radiodensity (> -83 HU) | 1.79 (1.06-3.04)  | 0.03    |
| <b>Male Patients</b>             |                   |         |
| MELD score                       | 1.03 (1.00-1.07)  | 0.049   |
| Refractory Ascites               | 1.46 (0.84-2.55)  | 0.18    |
| Encephalopathy                   | 2.33 (1.39-3.89)  | 0.001   |
| High SAT Radiodensity (> -74 HU) | 1.79 (1.02-3.13)  | 0.04    |

Abbreviations: AILD, autoimmune liver diseases; CI, confidence interval; MELD, model for end-stage liver disease; SAT, subcutaneous adipose tissue; sHR, sub-distribution hazard ratio  
sHRs and P values were estimated using Fine-Gray subdistribution hazard model.

**Table S2. Comparison of Adipose Tissue Radiodensity Between Patients with Cirrhosis and Donors**

| <b>Adipose Tissue Radiodensity</b>        | <b>Cirrhosis (n=786)</b> | <b>Donor (n=129)</b> | <b>P-value</b> |
|-------------------------------------------|--------------------------|----------------------|----------------|
| SAT radiodensity (HU)                     | -87±16                   | -101±8               | <0.001         |
| High SAT Radiodensity                     | 203 (26)                 | 2 (2)                | <0.001         |
| Visceral adipose tissue radiodensity (HU) | -78±10                   | -89±8                | <0.001         |

Abbreviations: HU, Hounsfield unit; SAT, Subcutaneous adipose tissue.

High SAT radiodensity was defined as SAT radiodensity >-83 in females and >-74 in males.
